# Supplementary material for: Highly reduced VOx nanotube cathode materials with ultra-high capacity for magnesium ion batteries
Source: Royal Society of Chemistry journal article supplement (doi:10.1039/c4ta05564k), 2014-01-01
Supplement: c4ta05564k1.pdf [file c4ta05564k1.pdf]

# Supplementary Information

## Highly Reduced VO<sub>x</sub> Nanotube Cathode Materials with Ultra-high Capacity for Magnesium Ion Batteries

Ryoung-Hee Kim, Ju-Sik Kim, Hyun-Jin Kim, Won-Seok Chang, Dong-Wook Han,\* Seok-Soo Lee\* and Seok-Gwang Doo

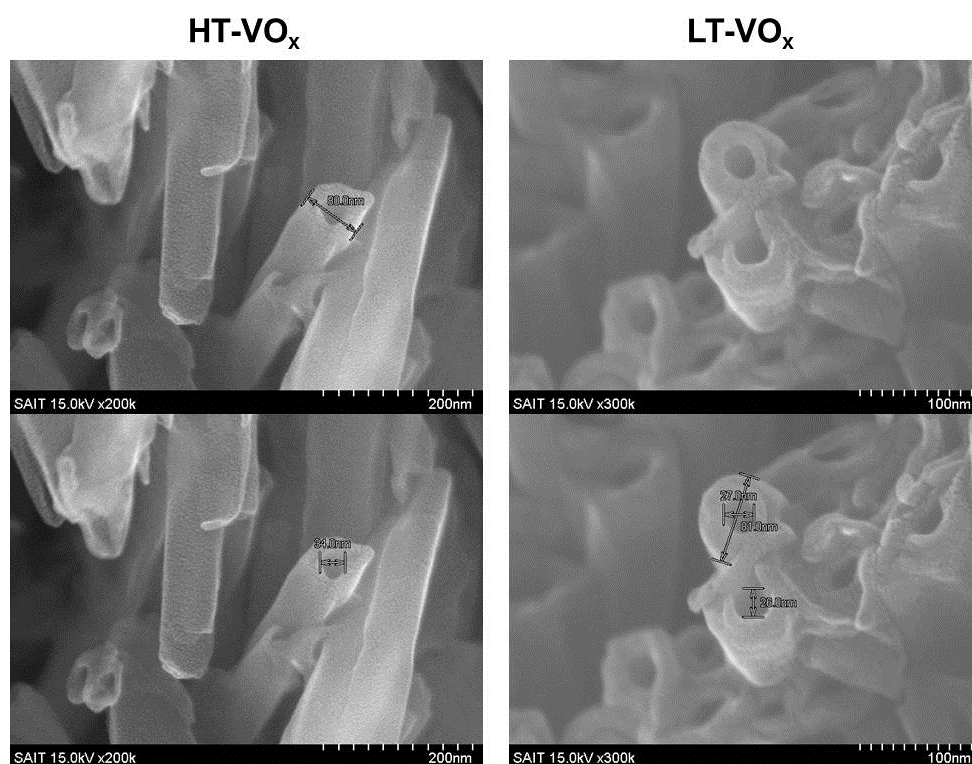

Fig.S1 SEM images of LT-VO<sub>x</sub> and HT-VO<sub>x</sub> nanotubes.

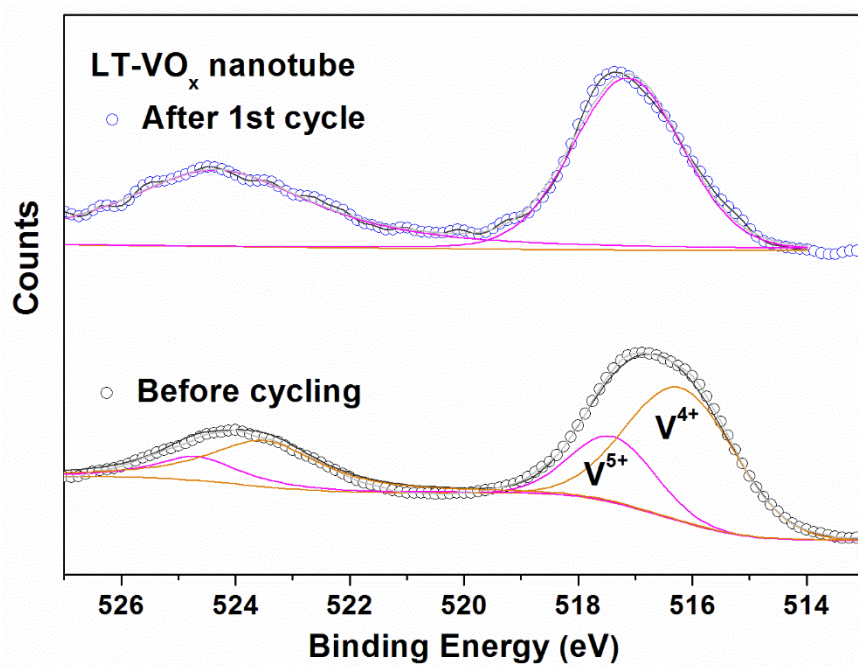

**Fig.S2** X-ray photoelectron spectroscopy (XPS) profiles of LT-VO<sub>x</sub> before cycling and after the first cycle.
